# Supplementary material
Source: PubMed Central journal article supplement (PMC3088613)
Supplement: 1018972108_pnas.201018972SI.pdf [file 1018972108_pnas.201018972SI.pdf]

# Supporting Information

Ortiz-Guerrero et al. 10.1073/pnas.1018972108

## SI Materials and Methods

**Growth Conditions.** *M. xanthus* was grown at 33 °C in casitone-Tris (CTT) medium, and *E. coli* at 37 °C in Luria broth. When required, the growth media were supplemented with vitamin B<sub>12</sub> (Sigma-Aldrich) as described previously (1). Concentrations of cobalamin stocks in aqueous buffer were estimated by absorbance using the following extinction coefficients:  $\epsilon$  (M<sup>-1</sup>cm<sup>-1</sup>) of 27,500 at 361 nm for CNB<sub>12</sub>, 8,200 at 522 nm for AdoB<sub>12</sub>, and 9,100 at 520 nm for MeB<sub>12</sub> (2). *T. thermophilus* HB8 was grown as recommended (DSMZ) and genomic DNA was isolated using the Wizard kit (Promega). Overexpression of intein and His<sub>6</sub>-tagged proteins was induced overnight at 18 °C and 25 °C, respectively.

**Strain Construction and Phenotypic Analysis.** CarH and CarA coding segments were amplified by PCR using pMR2830 and pMR2838, respectively (Table S2). *TicarH* was PCR-amplified from genomic DNA with appropriate primers, cloned into the NdeI and BamHI sites of pET15b, and used to PCR-amplify the TtCarHCt coding sequence. Hybrid genes encoding chimeric proteins were obtained by PCR overlap extension (3), and cloned into the 5' KpnI and 3' EcoRI sites of pMR2828 (Table S2), where they are expressed from a constitutive promoter (1, 4). These plasmid constructs have a 1.38-kb *M. xanthus* DNA fragment for chromosomal integration by homologous recombination, and a kanamycin resistance (Km<sup>R</sup>) marker for positive selection. Every plasmid construct was verified by DNA sequencing and electroporated into the  $\Delta carA \Delta carH$  *M. xanthus* strain (MR1716; Table S2), and selected for chromosomal integration by growth on CTT plates with 40  $\mu$ g/mL Km. pMR3184 has an insert for generating in-frame *carS* deletions (5), a positive selection Km<sup>R</sup> marker, and a galactose sensitivity gene (Gal<sup>S</sup>) for negative selection. It was introduced into the  $\Delta carA$ ,  $\Delta carH$ , or  $\Delta carA \Delta carH$  *M. xanthus* strains obtained previously (MR844, MR848, and MR1716, respectively; Table S2). Strains with the  $\Delta carS$  allele were generated by allelic exchange (1), and verified by PCR analysis. To obtain a complete in-frame deletion of the *M. xanthus pduO* gene, we first constructed plasmid pMR3425, with approximately 0.91 kb and 0.93 kb of genomic DNA immediately upstream and downstream of *pduO*, respectively. pMR3425 (Table S2), which also contains Km<sup>R</sup> and Gal<sup>S</sup> markers, was introduced into the  $\Delta carA$  *M. xanthus* strain and haploid colonies with the  $\Delta pduO$  allele (as well as the  $\Delta carA$  one), obtained following procedures previously described (1), were identified by PCR. To assay the color phenotypes, cells were streaked or spotted (8  $\mu$ L cell droplets of exponentially growing cultures at OD<sub>550</sub> of 0.8) on CTT plates and grown for 2 d in the dark or in the light with or without 1  $\mu$ M CNB<sub>12</sub> in the growth medium. The *carB::Tn5-lac-132 P<sub>B</sub>-lacZ* reporter probe (conferring tetracycline resistance) was introduced into a given strain, and its expression level was estimated in terms of  $\beta$ -gal-specific activity (in nmol of *o*-nitrophenyl  $\beta$ -D-galactoside hydrolyzed/min/mg protein). Reporter *lacZ* expression in the dark and in the light, and in the presence or absence of B<sub>12</sub> was carried out as described (1). Basically, a starter culture of the *M. xanthus* strain under study was grown in the dark in 10 mL CTT supplemented with the required antibiotic. This culture was added to two separate culture flasks (0.25 mL each) containing 12 mL fresh CTT and antibiotic, with 1  $\mu$ M CNB<sub>12</sub> included in one of the two flasks. After 16 h growth in the dark at 33 °C, each 12-mL culture was split into two, one of which remained in the dark and the other exposed to light, while growth continued for another 8 h.

**Light Irradiation.** Unless otherwise specified, plates or liquid cell cultures exposed to light were illuminated with white light from three 18-W fluorescent lamps at an intensity of approximately 10 W/m<sup>2</sup>. For illumination with red light (at approximately 12 W/m<sup>2</sup>), cells were exposed to light from four 100-W incandescent lamps passed through a Supergel number 26 red filter (Rosco). Protein samples in 1.5 mL tubes were irradiated for 5 min with light or red light (as described earlier), or with light centered at wavelengths of 360 nm (12 W/m<sup>2</sup>), 438 nm (15 W/m<sup>2</sup>), and 540 nm (11 W/m<sup>2</sup>) using UV-2E/C, blue-light CFP, and G-2E/C filter sets, respectively, in a Nikon Eclipse 80i epifluorescence microscope. Light intensities were estimated by using an 1815-C optical power meter equipped with an 818-SL detector (Newport).

**Two-Hybrid Analysis.** The *E. coli* two-hybrid system used is based on functional complementation of the T25 and T18 fragments of the *Bordetella pertussis* adenylate cyclase catalytic domain when two test proteins interact (6). Coding regions of interest were PCR-amplified and cloned into the XbaI and BamHI sites of pKT25 or pUT18C. Given pairs of these constructs were introduced into *E. coli* strain BTH101 (*cya*<sup>-</sup>) by electroporation. Negative controls were pairs with only one fusion protein expressed, and a positive control was the GCN4 leucine zipper. Interaction was assessed qualitatively from the blue color developed on LB plates containing 40  $\mu$ g/mL X-Gal with or without 1  $\mu$ M CNB<sub>12</sub> in the dark or light, and quantitatively by the  $\beta$ -gal-specific activity measured in three independent experiments for each interacting pair tested (6).

**Protein Purification.** His<sub>6</sub>-tagged TtCarH overexpressed using pET15b was purified under native conditions using TALON metal affinity resin (Clontech) and imidazole elution. Other proteins were overexpressed using pTYB12 constructs as fusions to intein, which was subsequently removed by intramolecular cleavage (leaving an N-terminal AGH) and purified with the IMPACT kit and accompanying protocols (New England Biolabs). MonoS ion-exchange chromatography was used in a final purification step. Protein concentrations were determined using the BioRad protein assay kit, or absorbance at 280 nm with  $\epsilon_{280}$  (M<sup>-1</sup>cm<sup>-1</sup>) of 30,940 (CarA, CTt1), 21,220 (CarAct), 20,970 (TtCarHCt and its H177A variant), and 32,430 (CTt2). Absorption spectra were recorded in the absorbance mode of a Pistar spectropolarimeter (Applied Photophysics) or a DU-640 spectrophotometer (Beckman).

**DNA-Binding Assays.** EMSA and DNase I footprinting assays under similar solution conditions were performed in the dark or after light irradiation (as described earlier) using as 5'-end <sup>32</sup>P-labeled PCR-amplified DNA probes: (i) a 130-bp probe (CCR130) for CarA, CTt1, and CTt2 (Fig. S24); and (ii) a 177-bp probe for TtCarH (Fig. S6A). A 20- $\mu$ L reaction volume containing the DNA probe (1.2 nM, approximately 13,000 cpm), protein, and, as required, the specified cobalamin (final concentrations as indicated), 100 mM KCl, 25 mM Tris, pH 8, 1 mM DTT, 10% glycerol, 200 ng/ $\mu$ L BSA, and 1  $\mu$ g of sheared salmon sperm DNA as nonspecific competitor was incubated at 37 °C for 30 min. EMSA reactions were performed, and the gels were loaded and run, in a dark room in which very dim stray light aided in viewing. Samples were covered with aluminum foil during the 30-min incubation period. The electrophoresis was carried out in the dark (inside a cooling chamber) for 1.5 h at 200 V, 10 °C in an 6% nondenaturing polyacrylamide gel (37.5:1 acrylamide:bisacrylamide) that was prerun for 30 min in 0.5 $\times$  TBE buffer

(45 mM Tris base, 45 mM boric acid, 1 mM EDTA). Identical reaction conditions were used in DNase I footprinting assays except that 10 mM  $MgCl_2$  was added to the incubation buffer. As with EMSA, DNase I footprinting reactions were performed in a dark room with very low light. After incubating the DNA probe with protein in the absence or presence of a given cobalamin, the mix was treated with 0.07 units of DNase I for 2 min at 37 °C and quenched with EDTA. When the reaction had been stopped, it was not necessary to maintain the dark conditions, and sample loading onto the gel was carried out under normal light. DNA was ethanol-precipitated and run in 8 M urea 6% polyacrylamide gels against G+A and C+T chemical sequencing ladders of the DNA probe used. EMSA and DNase I footprinting assays were carried out for each experimental condition three to 10 times. Gels were vacuum-dried and analyzed by autoradiography.

**SEC.** An AKTA HPLC unit and a Superdex200 analytical size-exclusion column (GE Life Sciences) equilibrated with 150 mM NaCl, 50 mM phosphate buffer, pH 7.5, and 2 mM  $\beta$ -mercaptoethanol was used for SEC. The column was calibrated by using the following as standards (Sigma-Aldrich): aprotinin (6.5 kDa), cytochrome C (12.4 kDa), carbonic anhydrase (29 kDa), ovalbumin (43 kDa), BSA (66 kDa), yeast alcohol dehydrogenase (150 kDa),  $\beta$ -amylase (200 kDa), blue dextran (2 MDa, to determine the void volume  $V_0$ ), and vitamin B<sub>12</sub> (1.35 kDa, to estimate total bed volume,  $V_t$ ). The calibration curve obtained was:  $\log M_r = 7.885 - 0.221V_e$ , where  $M_r$  is the apparent molecular weight and  $V_e$  is the elution volume. Protein (100  $\mu$ L; 45–165  $\mu$ M), pure or incubated with a fivefold molar excess of a given cobalamin for at least 15 min in the dark, was injected into the column or, if required, subjected to light irradiation as described earlier, just before injection. Elution at 0.4 mL/min flow rate was tracked by absorbance at 280, 361, and 522 nm. Peak fractions were collected and analyzed for  $M_r$  (from  $V_e$ ), and checked by SDS/PAGE. The reported  $M_r$  and the error correspond to the

mean of a minimum of three independent measurements and SEM, respectively. The protein concentration in the peak was estimated using the BioRad protein assay and that of AdoB<sub>12</sub> from the absorbance at 522 nm.

**Chemical Cross-Linking.** For chemical cross-linking in the dark at room temperature, 25 mM of freshly prepared dithiobis(succinimidylpropionate) (Pierce) in DMSO was added to a final concentration of 1 to 2.5 mM to 5  $\mu$ M pure protein in 150 mM NaCl, 50 mM phosphate buffer, pH 7.5 (total volume 100  $\mu$ L). After 1 h incubation, cross-linking was quenched with 1 M Tris, pH 7.5 (150 mM final concentration), for another 15 min. Samples in Novex LDS-PAGE loading buffer were analyzed under nonreducing conditions by SDS/PAGE by using 10% NuPAGE Bis-Tris precast gels with Mes buffer (Invitrogen). The reproducibility of the cross-linking data was checked in three independent experiments.

**ITC.** ITC was carried out in a VP-ITC system (MicroCal). ITC buffer (100 mM NaCl, 50 mM phosphate buffer, pH 7.5) was used in TtCarHCt dialysis and for preparing cobalamin stock solutions. Concentrations were determined as described earlier. Samples were degassed before ITC. TtCarHCt (1.44 mL; 18  $\mu$ M; or buffer alone, to correct for the heat of dilution of the titrant) in the ITC cell was titrated with 30 injections of 8  $\mu$ L of a given cobalamin (65–75  $\mu$ M) in the dark or after irradiation with light (as described earlier) at 25 °C with stirring (300 rpm). Heat changes were detected only in titrations of TtCarHCt with AdoB<sub>12</sub>, and data from four independent experiments were analyzed. Each of these, after correcting for the heat of dilution of the titrant, was fit to a single-site binding model using MicroCal Origin software to estimate the binding stoichiometry ( $N$ ), enthalpy ( $\Delta H$ ), entropy ( $\Delta S$ ), and equilibrium association constant ( $K_a$ ) and the corresponding errors for each parameter.

1. Pérez-Marín MC, Padmanabhan S, Polanco MC, Murillo FJ, Elias-Arnanz M (2008) Vitamin B<sub>12</sub> partners the CarH repressor to downregulate a photoinducible promoter in *Myxococcus xanthus*. *Mol Microbiol* 67:804–819.
2. Hill JA, Pratt JM, Williams RJP (1964) The chemistry of vitamin B<sub>12</sub>. Part I. The valency and spectrum of the coenzyme. *J Chem Soc (Lond)* 5149–5153.
3. Horton RM, Hunt HD, Ho SN, Pullen JK, Pease LR (1989) Engineering hybrid genes without the use of restriction enzymes: Gene splicing by overlap extension. *Gene* 77: 61–68.
4. Pérez-Marín MC, López-Rubio JJ, Murillo FJ, Elias-Arnanz M, Padmanabhan S (2004) The N terminus of *Myxococcus xanthus* CarA repressor is an autonomously folding

domain that mediates physical and functional interactions with both operator DNA and antirepressor protein. *J Biol Chem* 279:33093–33103.

5. León E, et al. (2010) A bacterial antirepressor with SH3 domain topology mimics operator DNA in sequestering the repressor DNA recognition helix. *Nucleic Acids Res* 38:5226–5241.
6. Karimova G, Ullmann A, Ladant D (2000) A bacterial two-hybrid system that exploits a cAMP signaling cascade in *Escherichia coli*. *Methods Enzymol* 328:59–73.





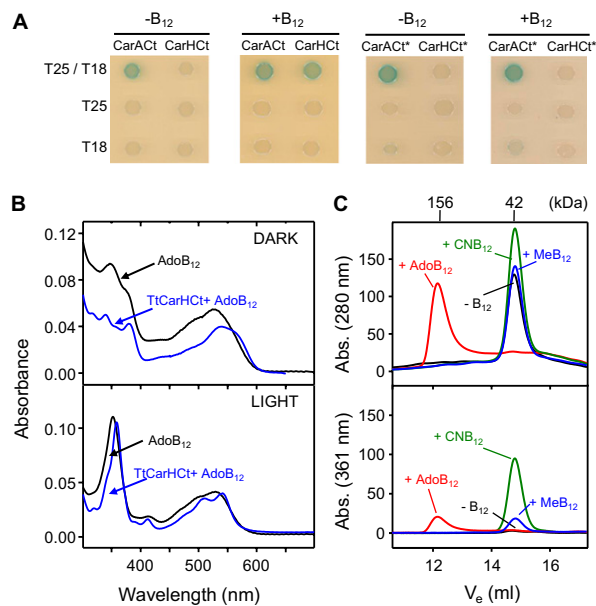

**Fig. 54.** Analysis of CarACT, CarHct, and CT2 interactions using two-hybrid analysis and SEC. (A) Two-hybrid analysis in *E. coli* for interactions of CarACT, its H175 to A variant (CarACT\*), CarHct, and its H193 to A variant (CarHct\*). Cells expressing fusions of the indicated C-terminal domain to both T25 and T18, or to just one (negative controls) were spotted on plates containing X-gal and grown in the dark. Interaction, if any, correlates with the intensity of the blue color developed by the spot. (B) Visible absorption spectra for TtCarHct with AdoB<sub>12</sub> (blue lines) and free AdoB<sub>12</sub> (black lines) for samples corresponding to the peaks eluted off a Superdex200 analytical column in the dark (Top) or after a 5-min exposure to light (Bottom). (C) Elution profiles off a Superdex200 for 45 μM CT2 alone (black lines) or with excess AdoB<sub>12</sub> (red lines), CNB<sub>12</sub> (green lines), or MeB<sub>12</sub> (blue lines) tracked by the absorbance (in arbitrary units) at 280 nm (Top) or 361 nm (Bottom). CT2 (calculated monomer molecular weight of 33.2 kDa) alone or in the presence of CNB<sub>12</sub> or MeB<sub>12</sub> elutes with an  $M_r$  of 41.3 ± 0.6 kDa, and as a tetramer ( $M_r$  = 156 ± 1 kDa) in the presence of AdoB<sub>12</sub>.  $M_r$  for each peak maximum is shown at the top.

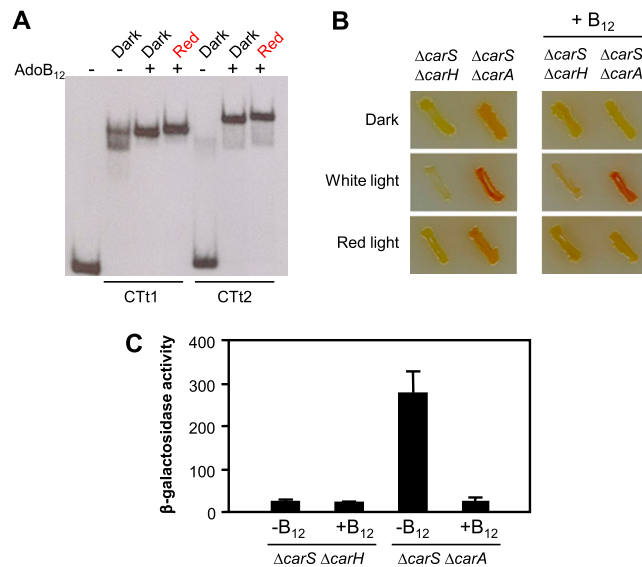

**Fig. 55.** Red light does not affect AdoB<sub>12</sub>-enhanced DNA binding in vitro, nor relieve B<sub>12</sub>-dependent CarH-mediated down-regulation of P<sub>B</sub> in vivo. (A) EMSA with probe CCR130 and 30 nM CT1 or CT2 for samples with and without AdoB<sub>12</sub> (fivefold excess relative to protein) in the dark and for samples with AdoB<sub>12</sub> that were irradiated with red light. (B) Colony color phenotype for the indicated *M. xanthus* strains grown in the dark or under white or red light with and without 1 μM CNB<sub>12</sub>. (C) Reporter P<sub>B</sub>-lacZ expression (in terms of specific β-gal activity) for cultures of the indicated *M. xanthus* strains grown under red light in the presence or absence of 1 μM CNB<sub>12</sub>. The mean of three independent measurements and the SEM for the specific β-gal activities are shown.

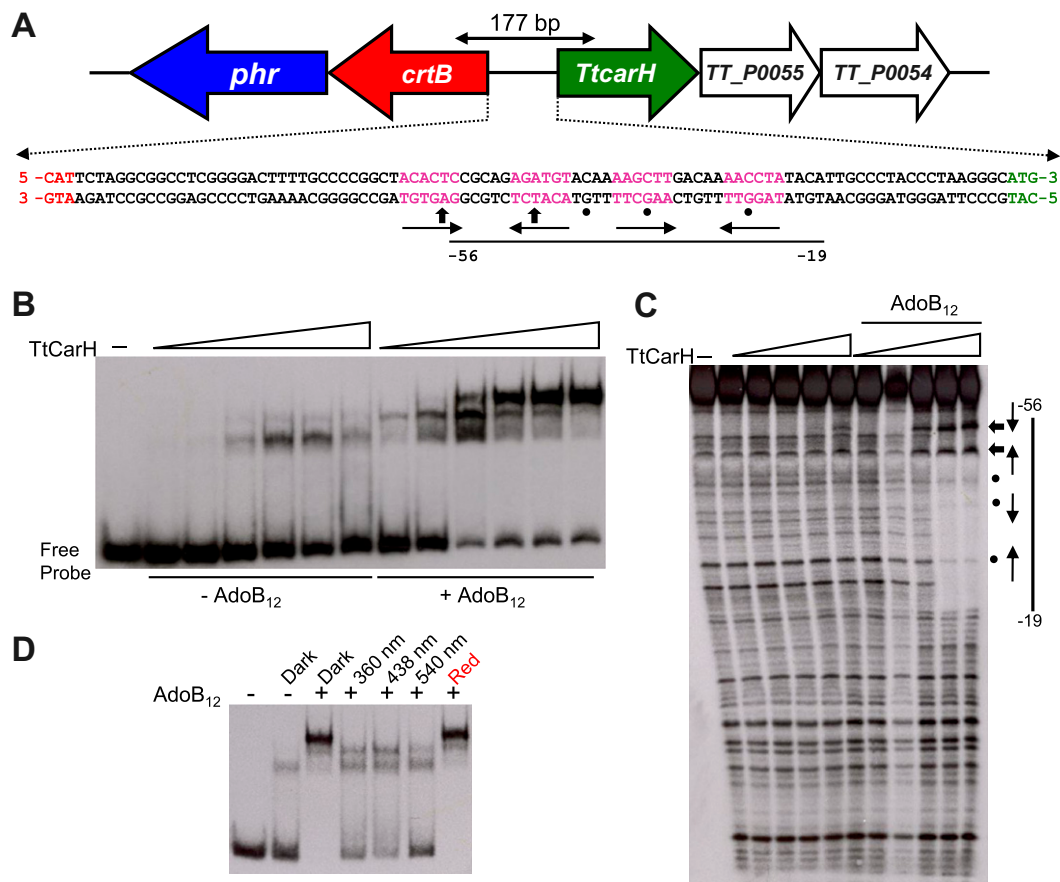

**Fig. 56.** AdoB<sub>12</sub> specifically enhances binding of TtCarH to a DNA probe from *T. thermophilus* that contains a CarA/CarH-like operator. (A) Genome context of *TtcarH* in *T. thermophilus* megaplasmid pTT27 (NCBI accession no. AE017222). Neighboring gene annotations are as follows: *crtB*, phytoene synthase; *phr*, deoxyribodipyrimidine photolyase; *TT\_P0055*, CAP/FNR-type regulatory protein; and *TT\_P0054*, NADH-ubiquinone oxidoreductase subunit. The 177-bp probe (double-headed arrow at top) used in DNA-binding assays contains the 92-bp *TtcarH-crtB* intergenic region (sequence shown) with 38 bp upstream and 47 bp downstream segments. The annotated initiator codon for *TtcarH* is in green and that for *crtB* in red. The four segments that resemble the CarA/CarH bipartite operator are in magenta with thin inverted arrows below. The line further below spans the DNase I footprint. Numbers are relative to the translation initiation codon for *TtcarH*. The thick arrows point to hypersensitive sites, and the dots to sites that are not protected. (B) EMSA with TtCarH (25, 50, 100, 200, 400, and 900 nM, from left to right) and the 177-bp probe in the dark with and without AdoB<sub>12</sub>. (C) DNase I footprint for TtCarH (25, 50, 100, 200, and 400, from left to right) binding with and without AdoB<sub>12</sub> to the 177-bp probe (5'-labeled in the bottom strand in A). (D) EMSA with 400 nM TtCarH with and without AdoB<sub>12</sub> added, and incubated in the dark (35 min) or exposed to the indicated light (5 min) after 30 min incubation in the dark. Leftmost lane shows probe alone. In B-D, AdoB<sub>12</sub>, when present, is at a fivefold molar excess relative to TtCarH.

**Table S1. CarA/CarH-like proteins in bacteria**

| Bacteria                                                                           | Taxonomical group               | NCBI accession no.               |
|------------------------------------------------------------------------------------|---------------------------------|----------------------------------|
| MerR DNA-binding domain + B <sub>12</sub> -binding domain (CarA/CarH-like protein) |                                 |                                  |
| <i>Haliangium ochraceum</i> *                                                      | δ-Proteobacteria (Myxococcales) | YP_003266651                     |
| <i>M. xanthus</i> *                                                                | δ-Proteobacteria (Myxococcales) | CAA79964 (CarA), CAA79965 (CarH) |
| <i>Plesiocystis pacifica</i> *                                                     | δ-Proteobacteria (Myxococcales) | ZP_01911070                      |
| <i>Sorangium cellulosum</i> *                                                      | δ-Proteobacteria (Myxococcales) | YP_001611216                     |
| <i>S. aurantiaca</i> *                                                             | δ-Proteobacteria (Myxococcales) | YP_003956654, YP_003956655       |
| <i>Bdellovibrio bacteriovorus</i>                                                  | δ-Proteobacteria                | NP_967879                        |
| <i>Desulfuromonas acetoxidans</i>                                                  | δ-Proteobacteria                | ZP_01313691                      |
| <i>Desulfohalobium retbaense</i>                                                   | δ-Proteobacteria                | YP_003198393                     |
| <i>Geobacter lovleyi</i>                                                           | δ-Proteobacteria                | YP_001951625                     |
| <i>Meiothermus ruber</i> *                                                         | Deinococcus-thermus             | YP_003506173                     |
| <i>Meiothermus silvanus</i> *                                                      | Deinococcus-thermus             | YP_003684883                     |
| <i>Thermus aquaticus</i> *                                                         | Deinococcus-thermus             | ZP_03497494                      |
| <i>T. thermophilus</i> *                                                           | Deinococcus-thermus             | YP_145339 (TtCarH)               |
| <i>Truepera radiovictrix</i>                                                       | Deinococcus-thermus             | YP_003706311                     |
| <i>Agrobacterium vitis</i>                                                         | α-Proteobacteria                | YP_002550011                     |
| <i>Hoeflea phototrophica</i>                                                       | α-Proteobacteria                | ZP_02166227                      |
| <i>Acidovorax delafieldii</i>                                                      | β-Proteobacteria                | ZP_04760938                      |
| <i>Acidovorax ebreus</i>                                                           | β-Proteobacteria                | YP_002553836                     |
| <i>Acidovorax</i> sp.                                                              | β-Proteobacteria                | YP_987184                        |
| <i>Azoarcus</i> sp.                                                                | β-Proteobacteria                | YP_934810                        |
| <i>Bordetella avium</i>                                                            | β-Proteobacteria                | YP_784891                        |
| <i>Candidatus accumulibacter</i>                                                   | β-Proteobacteria                | YP_003169177                     |
| <i>Dechloromonas aromatica</i>                                                     | β-Proteobacteria                | YP_283714                        |
| <i>Delftia acidovorans</i>                                                         | β-Proteobacteria                | YP_001565315                     |
| <i>Herminiimonas arsenicoxydans</i>                                                | β-Proteobacteria                | CAL62551                         |
| <i>Laribacter hongkongensis</i>                                                    | β-Proteobacteria                | YP_002794311                     |
| <i>Leptothrix cholodnii</i>                                                        | β-Proteobacteria                | YP_001789500                     |
| <i>Limnobacter</i> sp.                                                             | β-Proteobacteria                | ZP_01915313                      |
| <i>Methylovorus</i> sp.                                                            | β-Proteobacteria                | YP_003051081                     |
| <i>Methylibium petroleiphilum</i>                                                  | β-Proteobacteria                | YP_001019435                     |
| <i>Polaromonas naphthalenivorans</i>                                               | β-Proteobacteria                | YP_981683                        |
| <i>Ralstonia eutropha</i>                                                          | β-Proteobacteria                | YP_293403                        |
| <i>Thaueria</i> sp.                                                                | β-Proteobacteria                | YP_002354707                     |
| <i>Thiomonas intermedia</i>                                                        | β-Proteobacteria                | YP_003644171                     |
| <i>Thiomonas</i> sp.                                                               | β-Proteobacteria                | CAZ89507                         |
| <i>Methylobacter tundripaludum</i>                                                 | γ-Proteobacteria                | ZP_07654418                      |
| <i>Nitrosococcus halophilus</i>                                                    | γ-Proteobacteria                | YP_003525843                     |
| <i>Magnetococcus</i> sp.                                                           | Proteobacteria                  | YP_867583                        |
| <i>Actinosynnema mirum</i>                                                         | Actinobacteria                  | YP_003104187                     |
| <i>Amycolatopsis mediterranei</i> *                                                | Actinobacteria                  | YP_003766261                     |
| <i>Dermacoccus</i> sp.                                                             | Actinobacteria                  | ZP_07704773                      |
| <i>Frankia</i> sp. <i>Eul1c</i>                                                    | Actinobacteria                  | ZP_06238726                      |
| <i>Janibacter</i> sp.                                                              | Actinobacteria                  | ZP_00994632                      |
| <i>Micromonospora</i> sp.                                                          | Actinobacteria                  | EEP72734                         |
| <i>Nakamurella multipartita</i> *                                                  | Actinobacteria                  | YP_003199787                     |
| <i>Nocardia farcinica</i> *                                                        | Actinobacteria                  | YP_119275                        |
| <i>Streptomyces ambofaciens</i> *                                                  | Actinobacteria                  | CAJ88224                         |
| <i>Streptomyces avermitilis</i> *                                                  | Actinobacteria                  | BAC68924                         |
| <i>Streptomyces coelicolor</i> *†                                                  | Actinobacteria                  | NP_624528 (LitR)                 |
| <i>Streptomyces flavogriseus</i>                                                   | Actinobacteria                  | ZP_05801878                      |
| <i>Streptomyces ghanaensis</i>                                                     | Actinobacteria                  | ZP_04684938                      |
| <i>Streptomyces lividans</i> *                                                     | Actinobacteria                  | ZP_05528694                      |
| <i>Streptomyces pristinaespiralis</i>                                              | Actinobacteria                  | EDY64715                         |
| <i>Streptomyces</i> sp. <i>C</i>                                                   | Actinobacteria                  | ZP_07285287                      |
| <i>Streptomyces sviveus</i>                                                        | Actinobacteria                  | EFH28311                         |
| <i>Streptosporangium roseum</i> *                                                  | Actinobacteria                  | YP_003337347                     |
| <i>Chitinophaga pinensis</i> *                                                     | Bacteroidetes                   | YP_003125248                     |
| <i>Croceibacter atlanticus</i> *                                                   | Bacteroidetes                   | YP_003714950                     |
| <i>Cytophaga hutchinsonii</i> *                                                    | Bacteroidetes                   | YP_677677, YP_678640             |
| <i>Dokdonia donghaensis</i> *                                                      | Bacteroidetes                   | ZP_01051271                      |
| <i>Dyadobacter fermentans</i> *                                                    | Bacteroidetes                   | YP_003086417                     |
| <i>Flavobacteria bacterium</i> *                                                   | Bacteroidetes                   | ZP_01202526                      |

Table S1. Cont.

| Bacteria                                                                               | Taxonomical group                   | NCBI accession no.         |
|----------------------------------------------------------------------------------------|-------------------------------------|----------------------------|
| <i>Kordia algicida</i> *                                                               | Bacteroidetes                       | ZP_02163391                |
| <i>Leeuwenhoekiella blandensis</i> *                                                   | Bacteroidetes                       | ZP_01060805                |
| <i>Microscilla marina</i>                                                              | Bacteroidetes                       | ZP_01688448                |
| <i>Pedobacter heparinus</i> *                                                          | Bacteroidetes                       | YP_003093970               |
| <i>Psychroflexus torquis</i> *                                                         | Bacteroidetes                       | ZP_01253496                |
| <i>Rhodothermus marinus</i> *                                                          | Bacteroidetes                       | ACY48488                   |
| <i>Robiginitalea biformata</i> *                                                       | Bacteroidetes                       | YP_003195366               |
| <i>Zunongwangia profunda</i> *                                                         | Bacteroidetes                       | YP_003583423               |
| <i>Chloroherpeton thalassium</i> *                                                     | Chlorobi                            | YP_001996324               |
| <i>Anoxybacillus flavithermus</i>                                                      | Firmicutes                          | YP_002315426               |
| <i>Bacillus cereus</i> sp.                                                             | Firmicutes                          | YP_001374529               |
| <i>Bacillus cellulosilyticus</i>                                                       | Firmicutes                          | ZP_06362586                |
| <i>Bacillus megaterium</i>                                                             | Firmicutes                          | YP_003564800               |
| <i>Bacillus mycoides</i>                                                               | Firmicutes                          | ZP_04156336                |
| <i>Bacillus pseudofirmus</i>                                                           | Firmicutes                          | YP_003427992               |
| <i>Bacillus pseudomycooides</i>                                                        | Firmicutes                          | ZP_04150564                |
| <i>Bacillus selenitireducens</i>                                                       | Firmicutes                          | YP_003700225               |
| <i>Bacillus thuringiensis</i>                                                          | Firmicutes                          | ZP_04144840                |
| <i>Bacillus weihenstephanensis</i>                                                     | Firmicutes                          | YP_001644286               |
| <i>Exiguobacterium sibiricum</i>                                                       | Firmicutes                          | YP_001814285               |
| <i>Exiguobacterium</i> sp.                                                             | Firmicutes                          | YP_002887336               |
| <i>Heliobacterium modesticaldum</i>                                                    | Firmicutes                          | YP_001680059               |
| <i>Lysinibacillus fusiformis</i> *                                                     | Firmicutes                          | ZP_07050820                |
| <i>Paenibacillus</i> sp.                                                               | Firmicutes                          | YP_003014814               |
| <i>Chloroflexus aggregans</i> *                                                        | Chloroflexi                         | YP_002462292               |
| <i>Chloroflexus aurantiacus</i> *                                                      | Chloroflexi                         | YP_001636279               |
| <i>Chloroflexus</i> sp.*                                                               | Chloroflexi                         | YP_002570616               |
| <i>Herpetosiphon aurantiacus</i> *                                                     | Chloroflexi                         | YP_001545468               |
| <i>Ktedonobacter racemifer</i>                                                         | Chloroflexi                         | ZP_06969864                |
| <i>Oscillochloris trichooides</i>                                                      | Chloroflexi                         | ZP_07686602                |
| <i>Roseiflexus castenholzii</i> *                                                      | Chloroflexi                         | YP_001431863               |
| <i>Roseiflexus</i> sp.*                                                                | Chloroflexi                         | YP_001276447               |
| <i>Pirellula staleyi</i>                                                               | Planctomycetes                      | ADB17396                   |
| <i>Planctomyces maris</i>                                                              | Planctomycetes                      | ZP_01852990                |
| <i>Planctomyces brasiliensis</i>                                                       | Planctomycetes                      | EFQ19218                   |
| <i>Rhodopirellula baltica</i>                                                          | Planctomycetes                      | NP_864391                  |
| <i>Opitutus terrae</i>                                                                 | Verrucomicrobia                     | YP_001817995               |
| <i>Verrucomicrobium spinosum</i>                                                       | Verrucomicrobia                     | ZP_02929072                |
| <i>Candidatus Nitrospira defluvii</i>                                                  | Nitrospirales                       | CBK39973                   |
| <i>Thermobaculum terrenum</i> *                                                        | Thermobaculum                       | YP_003323754               |
| B <sub>12</sub> -binding domain + sensor hybrid histidine kinase or response regulator |                                     |                            |
| <i>Planctomyces maris</i>                                                              | Planctomycetes                      | ZP_01857708                |
| <i>Clostridium cellulovorans</i>                                                       | Firmicutes                          | YP_003842171               |
| <i>Moorella thermoacetica</i>                                                          | Firmicutes                          | YP_430949                  |
| <i>Cyanothece</i> sp.                                                                  | Cyanobacteria                       | YP_002485444, YP_003889199 |
| Taxonomical group                                                                      | BLAST hits vs. TtCarHct (E < 0.001) | Length (no. residues)      |
| Standalone B <sub>12</sub> -binding domain proteins                                    |                                     |                            |
| δ-Proteobacteria <sup>‡</sup>                                                          | 12                                  | 207–239                    |
| α-Proteobacteria                                                                       | 12                                  | 192–241                    |
| Actinobacteria                                                                         | 4                                   | 199–227                    |
| Firmicutes                                                                             | 33                                  | 160–233                    |
| Bacteroidetes                                                                          | 2                                   | 220, 224                   |

\*Gene for CarA/CarH-like protein located in the vicinity of gene encoding a carotenogenic enzyme and/or photolyase in the corresponding bacterial genome.

<sup>†</sup>CarA/CarH like protein implicated in light-induced carotenogenesis (1).

<sup>‡</sup>One of these occurs in *M. xanthus* (NCBI Acc. No. YP\_628514).

1. Takano H, Obitsu S, Beppu T, Ueda K (2005) Light-induced carotenogenesis in *Streptomyces coelicolor* A3(2): Identification of an extracytoplasmic function sigma factor that directs photodependent transcription of the carotenoid biosynthesis gene cluster. *J Bacteriol* 187:1825–1832.



**Table S2. Strains and plasmids used in this work**

| Strain or plasmid | Relevant phenotype                                   | Relevant genotype or description                                                                                                                                                                                            | Source/ref.*  |
|-------------------|------------------------------------------------------|-----------------------------------------------------------------------------------------------------------------------------------------------------------------------------------------------------------------------------|---------------|
| <i>M. xanthus</i> |                                                      |                                                                                                                                                                                                                             |               |
| DK1050            | Car <sup>+</sup>                                     | WT                                                                                                                                                                                                                          | 1             |
| MR418             | Car <sup>-</sup> Tc <sup>R</sup> LacZ <sup>-</sup>   | <i>carB::Tn5-lac-132</i> (transposon insertion [ $\Omega$ MR401:: Tn5-lac])                                                                                                                                                 | 2             |
| MR844             | Car <sup>(+)</sup>                                   | $\Delta carA$                                                                                                                                                                                                               | 2             |
| MR848             | Car <sup>+</sup>                                     | $\Delta carH$                                                                                                                                                                                                               | 2             |
| MR1716            | Car <sup>C</sup>                                     | $\Delta carA \Delta carH$                                                                                                                                                                                                   | 3             |
| MR1728            | Car <sup>(+)</sup> Km <sup>R</sup>                   | $\Delta carA \Delta carH$ ; P <sub>C</sub> :: <i>carH</i>                                                                                                                                                                   | 3             |
| MR1744            | Car <sup>-</sup>                                     | $\Delta carA \text{ carB::Tn5-lac-132}$                                                                                                                                                                                     | Present study |
| MR1776            | Car <sup>-</sup>                                     | $\Delta carS$                                                                                                                                                                                                               | 4             |
| MR1777            | Car <sup>(+)</sup>                                   | $\Delta carS \Delta carA$                                                                                                                                                                                                   | Present study |
| MR1778            | Car <sup>C</sup>                                     | $\Delta carS \Delta carA \Delta carH$                                                                                                                                                                                       | Present study |
| MR1780            | Car <sup>-</sup> Tc <sup>R</sup> LacZ <sup>-</sup>   | $\Delta carS \text{ carB::Tn5-lac-132}$                                                                                                                                                                                     | Present study |
| MR1781            | Car <sup>-</sup> Tc <sup>R</sup> LacZ <sup>(+)</sup> | $\Delta carS \Delta carA \text{ carB::Tn5-lac-132}$                                                                                                                                                                         | Present study |
| MR1782            | Car <sup>-</sup> Tc <sup>R</sup> LacZ <sup>C</sup>   | $\Delta carS \Delta carA \Delta carH \text{ carB::Tn5-lac-132}$                                                                                                                                                             | Present study |
| MR1793            | Car <sup>-</sup>                                     | $\Delta carS \Delta carH$                                                                                                                                                                                                   | Present study |
| MR1794            | Car <sup>-</sup> Tc <sup>R</sup> LacZ <sup>-</sup>   | $\Delta carS \Delta carH \text{ carB::Tn5-lac-132}$                                                                                                                                                                         | Present study |
| MR2063            | Car <sup>(+)</sup> Km <sup>R</sup>                   | $\Delta carA \Delta carH$ ; P <sub>C</sub> :: <i>carA(1-79)/carH(94-299)</i>                                                                                                                                                | Present study |
| MR2064            | Car <sup>(+)</sup> Km <sup>R</sup>                   | $\Delta carA \Delta carH$ ; P <sub>C</sub> :: <i>carA(1-74)/carH(73-299)</i>                                                                                                                                                | Present study |
| MR2071            | Car <sup>(+)</sup> Km <sup>R</sup>                   | $\Delta carA \Delta carH$ ; P <sub>C</sub> :: <i>carA(1-79)/TtcarH(80-285)</i>                                                                                                                                              | Present study |
| MR2072            | Car <sup>(+)</sup> Km <sup>R</sup>                   | $\Delta carA \Delta carH$ ; P <sub>C</sub> :: <i>carH(1-93)/TtcarH(80-285)</i>                                                                                                                                              | Present study |
| MR2075            | Car <sup>C</sup>                                     | $\Delta carA \Delta pduO$                                                                                                                                                                                                   | Present study |
| MR2076            | Car <sup>-</sup> Tet <sup>R</sup> LacZ <sup>C</sup>  | $\Delta carA \Delta pduO \text{ carB::Tn5-lac-132}$                                                                                                                                                                         | Present study |
| <i>E. coli</i>    |                                                      |                                                                                                                                                                                                                             |               |
| DH5 $\alpha$      | —                                                    | $\phi 80 \text{ lacZ}\Delta M15 \Delta lacU169 \text{ recA1 endA1 hsdR17 supE44 thi-1 gyrA relA1}$                                                                                                                          | 5             |
| BL21(DE3)         | —                                                    | F <sup>-</sup> <i>ompT hsdS<sub>B</sub> (r<sub>B</sub><sup>-</sup>m<sub>B</sub><sup>-</sup>) gal dcm</i> with DE3, a $\lambda$ prophage carrying the T7 RNA polymerase gene                                                 | Novagen       |
| JM109             | —                                                    | e14-(McrA-) <i>recA1 endA1 gyrA96 thi-1 hsdR17 (r<sub>K</sub><sup>-</sup> m<sub>K</sub><sup>+</sup>) supE44 relA1 <math>\Delta</math>(<i>lac-proAB</i>) [F<sup>-</sup> <i>traD36 proAB lacIq</i><math>\Delta</math>M15]</i> | 6             |
| BTH101            | —                                                    | F <sup>-</sup> <i>cya99I alaD139 galE15 galK16 rpsL (Str<sup>R</sup>) hsdR2 mcrA1 mcrB1</i>                                                                                                                                 | 7             |
| Plasmids          |                                                      |                                                                                                                                                                                                                             |               |
| pET15b            | Km <sup>R</sup>                                      | Protein overexpression vector                                                                                                                                                                                               | Novagen       |
| pKT25             | Km <sup>R</sup>                                      | Vector for C-terminal fusion to the T25 fragment of CyaA                                                                                                                                                                    | 7             |
| pKT25Zip          | Km <sup>R</sup>                                      | GCN4 zipper positive control for two-hybrid analysis                                                                                                                                                                        | 7             |
| pMR2828           | Km <sup>R</sup>                                      | Vector with <i>carH(Nter)</i> expressed from a constitutive promoter (P <sub>C</sub> )                                                                                                                                      | 3             |
| pMR2830           | Km <sup>R</sup>                                      | Vector with <i>carH</i> expressed from P <sub>C</sub>                                                                                                                                                                       | 3             |
| pMR2838           | Km <sup>R</sup>                                      | Vector with <i>carA</i> expressed from P <sub>C</sub>                                                                                                                                                                       | 3             |
| pMR3014           | Amp <sup>R</sup>                                     | Vector overexpressing His <sub>6</sub> -tagged TtCarH                                                                                                                                                                       | Present study |
| pMR3184           | Km <sup>R</sup> Gal <sup>S</sup>                     | Vector with in-frame $\Delta carS$ allele                                                                                                                                                                                   | 4             |
| pMR3334           | Km <sup>R</sup>                                      | Vector with gene encoding chimera C1: CarA(1-79) + CarH(94-299) expressed from P <sub>C</sub>                                                                                                                               | Present study |
| pMR3335           | Km <sup>R</sup>                                      | Contains gene encoding chimera C2: CarA(1-74)+ CarH(73-299) expressed from P <sub>C</sub>                                                                                                                                   | Present study |
| pMR3363           | Km <sup>R</sup>                                      | Contains gene encoding chimera CTt2: CarH(1-93) + TtCarH(76-285) expressed from P <sub>C</sub>                                                                                                                              | Present study |
| pMR3370           | Km <sup>R</sup>                                      | Contains gene encoding chimera CTt1: CarA(1-79) + TtCarH(76-285) expressed from P <sub>C</sub>                                                                                                                              | Present study |
| pMR3375           | Amp <sup>R</sup>                                     | pUT18C- <i>carH(73-299)</i>                                                                                                                                                                                                 | Present study |
| pMR3376           | Km <sup>R</sup>                                      | pKT25- <i>carH(73-299)</i>                                                                                                                                                                                                  | Present study |
| pMR3381           | Amp <sup>R</sup>                                     | pUT18C- <i>carA(75-288)</i>                                                                                                                                                                                                 | Present study |
| pMR3382           | Km <sup>R</sup>                                      | pKT25- <i>carA(75-288)</i>                                                                                                                                                                                                  | Present study |
| pMR3390           | Amp <sup>R</sup>                                     | pUT18C- <i>carA(75-288) (H175A)</i>                                                                                                                                                                                         | Present study |
| pMR3391           | Km <sup>R</sup>                                      | pKT25- <i>carA(75-288) (H175A)</i>                                                                                                                                                                                          | Present study |
| pMR3392           | Amp <sup>R</sup>                                     | pUT18C- <i>carH(73-299) (H193A)</i>                                                                                                                                                                                         | Present study |
| pMR3393           | Km <sup>R</sup>                                      | pKT25- <i>carH(73-299) (H193A)</i>                                                                                                                                                                                          | Present study |
| pMR3394           | Amp <sup>R</sup>                                     | pUT18C- <i>TtcarH(76-285)</i>                                                                                                                                                                                               | Present study |
| pMR3395           | Km <sup>R</sup>                                      | pKT25- <i>TtcarH(76-285)</i>                                                                                                                                                                                                | Present study |
| pMR3425           | Km <sup>R</sup> Gal <sup>S</sup>                     | Vector with in-frame $\Delta pduO$ allele for constructing $\Delta pduO$ strain                                                                                                                                             | Present study |
| pMR3451           | Amp <sup>R</sup>                                     | Vector for overexpressing intein-tagged CarA                                                                                                                                                                                | Present study |
| pMR3469           | Amp <sup>R</sup>                                     | Vector for overexpressing intein-tagged CTt1                                                                                                                                                                                | Present study |
| pMR3470           | Amp <sup>R</sup>                                     | Vector for overexpressing intein-tagged CTt2                                                                                                                                                                                | Present study |

Table S2. Cont.

| Strain or plasmid | Relevant phenotype | Relevant genotype or description                          | Source/ref.*        |
|-------------------|--------------------|-----------------------------------------------------------|---------------------|
| pMR3471           | Amp <sup>R</sup>   | Vector for overexpressing intein-tagged TtCarHct          | Present study       |
| pMR3516           | Amp <sup>R</sup>   | pUT18C- <i>TtcarH</i> (76-285) (H177A)                    | Present study       |
| pMR3517           | Km <sup>R</sup>    | pKT25- <i>TtcarH</i> (76-285) (H177A)                     | Present study       |
| pMR3522           | Amp <sup>R</sup>   | Vector for overexpressing intein-tagged CarAct            | Present study       |
| pMR3536           | Amp <sup>R</sup>   | Vector for overexpressing intein-tagged TtCarHct (H177A)  | Present study       |
| pTYB12            | Amp <sup>R</sup>   | Vector for overexpressing intein-fusion proteins          | New England Biolabs |
| pUT18C            | Amp <sup>R</sup>   | Vector for C-terminal fusions to the T18 fragment of CyaA | 7                   |
| pUT18CZip         | Amp <sup>R</sup>   | GCN4 zipper positive control for two-hybrid analysis      | 7                   |

\*Strains constructed in this study as described in *SI Materials and Methods*.

Car<sup>+</sup>, WT phenotype for light-induced carotenogenesis; Car<sup>-</sup>, defective in light-induced carotenogenesis (note: strains with the *carB*, *Tn5-lac*-132 transposon insertion probe are Car<sup>-</sup>); Car<sup>C</sup>, constitutive phenotype for carotenogenesis; Car<sup>(+)</sup>, WT phenotype for carotenogenesis in the presence of B<sub>12</sub>. Km<sup>R</sup>, kanamycin resistance. Tc<sup>R</sup>, tetracycline resistance. P<sub>C</sub>, constitutive promoter. LacZ<sup>I</sup>, light-inducible synthesis of β-galactosidase; LacZ<sup>C</sup>, constitutive synthesis of β-gal; LacZ<sup>(+)</sup>, WT synthesis of β-gal in presence of B<sub>12</sub>; LacZ<sup>-</sup>, low β-gal levels.

- Ruiz-Vázquez R, Murillo FJ (1984) Abnormal motility and fruiting behavior of *Myxococcus xanthus* bacteriophage-resistant strains induced by a clear-plaque mutant of bacteriophage Mx8. *J Bacteriol* 160:818–821.
- Cervantes M, Murillo FJ (2002) Role for vitamin B<sub>12</sub> in light induction of gene expression in the bacterium *Myxococcus xanthus*. *J Bacteriol* 184:2215–2224.
- Pérez-Marín MC, Padmanabhan S, Polanco MC, Murillo FJ, Elias-Arnanz M (2008) Vitamin B<sub>12</sub> partners the CarH repressor to downregulate a photoinducible promoter in *Myxococcus xanthus*. *Mol Microbiol* 67:804–819.
- León E, et al. (2010) A bacterial antirepressor with SH3 domain topology mimics operator DNA in sequestering the repressor DNA recognition helix. *Nucleic Acids Res* 38:5226–5241.
- Hanahan D (1983) Studies on transformation of *Escherichia coli* with plasmids. *J Mol Biol* 166:557–580.
- Yanisch-Perron C, Vieira J, Messing J (1985) Improved M13 phage cloning vectors and host strains: Nucleotide sequences of the M13mp18 and pUC19 vectors. *Gene* 33:103–119.
- Karimova G, Ullmann A, Ladant D (2000) A bacterial two-hybrid system that exploits a cAMP signaling cascade in *Escherichia coli*. *Methods Enzymol* 328:59–73.
